# Supplementary material for: Temperature switch of electrochemical Seebeck coefficient of Fe2+/Fe3+via formation of [FeCl4]2−/[FeCl4]−
Source: Royal Society of Chemistry journal article supplement (doi:10.1039/d2ra07886d), 2023-01-01
Supplement: d2ra07886d1.pdf [file d2ra07886d1.pdf]

## Electronic Supplementary Information

### Temperature switch of electrochemical Seebeck coefficient of $\text{Fe}^{2+}/\text{Fe}^{3+}$ via formation of $[\text{FeCl}_4]^{2-}/[\text{FeCl}_4]^-$ complex

Yunika Nomura<sup>a</sup>, Dai Inoue<sup>a</sup>, and Yutaka Moritomo<sup>a,b,c</sup>

<sup>a</sup>Graduate School of Pure and Applied Sciences, University of Tsukuba, Tsukuba 305-8571,  
Japan

<sup>b</sup>Faculty of Pure and Applied Sciences, University of Tsukuba, Tsukuba 305-8571, Japan

<sup>c</sup>Tsukuba Research Center for Energy Materials Science (TREMS), University of Tsukuba,  
Tsukuba 305-8571, Japan

Contact information:

Yutaka Moritomo

Graduate School of Pure and Applied Sciences

Faculty of Pure and Applied Sciences, and

Tsukuba Research Center for Energy Materials Science (TREMS)

Univ. of Tsukuba, Tennodai 1-1-1, Tsukuba 305-8571, Japan

Tel & Fax +81-29-853-4337

e-mail: moritomo.yutaka.gf@u.tsukuba.ac.jp

---

| T [°C] | $n_{\text{Fe}^{3+}}$ (reference) | $n_{\text{Fe}^{3+}}$ (sample) | V [mV] |       |      |       |       |       |       |       |       |       |          |
|--------|----------------------------------|-------------------------------|--------|-------|------|-------|-------|-------|-------|-------|-------|-------|----------|
|        |                                  |                               | 1      | 2     | 3    | 4     | 5     | 6     | 7     | 8     | 9     | m     | $\sigma$ |
| 25     | 0.1                              | 0.2                           | 11.3   | 10.8  | 10.2 | 9.8   | 9.9   | 10.0  | 10.6  | 11.2  | 10.9  | 10.5  | 0.5      |
|        |                                  | 0.3                           | 25.6   | 25.1  | 24.8 | 24.4  | 24.1  | 23.9  | 24.0  | 24.0  | 23.9  | 24.4  | 0.6      |
|        |                                  | 0.4                           | 41.4   | 41.3  | 40.9 | 41.2  | 41.3  | 41.3  | 41.5  | 41.2  | 41.4  | 41.3  | 0.2      |
|        |                                  | 0.5                           | 48.6   | 47.7  | 46.8 | 45.6  | 45.6  | 45.7  | 45.6  | 45.6  | 45.8  | 46.3  | 1.1      |
|        |                                  | 0.6                           | 60.0   | 60.0  | 59.9 | 60.0  | 60.1  | 60.3  | 60.3  | 60.2  | 60.4  | 60.1  | 0.2      |
|        |                                  | 0.7                           | 80.3   | 79.7  | 79.6 | 79.8  | 79.9  | 80.0  | 80.0  | 79.9  | 79.8  | 79.9  | 0.2      |
|        |                                  | 0.8                           | 96.1   | 96.5  | 96.8 | 96.7  | 96.6  | 97.3  | 97.1  | 97.5  | 97.7  | 96.9  | 0.5      |
|        |                                  | 0.9                           | 118.4  | 118.1 | 118  | 118.3 | 118.7 | 119.1 | 119.4 | 119.6 | 119.9 | 118.8 | 0.6      |
|        |                                  | 50                            | 0.1    | 0.2   | 23.6 | 24.8  | 24.6  | 23.7  | 23.3  | 23.4  | 23.6  | 22.8  | 23.0     |
| 0.3    | 31.6                             |                               |        | 33.5  | 33.0 | 31.6  | 31.1  | 30.5  | 30.5  | 30.3  | 30.1  | 31.4  | 1.1      |
| 0.4    | 47.1                             |                               |        | 45.7  | 45.7 | 45.9  | 46.3  | 47.6  | 47.7  | 47.2  | 47.5  | 46.7  | 0.8      |
| 0.5    | 60.4                             |                               |        | 60.4  | 59.1 | 59.5  | 59.5  | 59.3  | 59.7  | 59.3  | 60.3  | 59.7  | 0.5      |
| 0.6    | 59.8                             |                               |        | 61.1  | 61.9 | 62.2  | 61.9  | 62.8  | 64.0  | 63.3  | 63.4  | 62.3  | 1.2      |
| 0.7    | 76.8                             |                               |        | 77.4  | 78.2 | 78.3  | 78.6  | 79.9  | 79.5  | 80.3  | 80.9  | 78.9  | 1.3      |
| 0.8    | 93.3                             |                               |        | 94.4  | 94.7 | 95.4  | 95.4  | 95.3  | 96.1  | 98.3  | 101.2 | 96.0  | 2.2      |
| 0.9    | 115.7                            |                               |        | 115.2 | 115  | 116.3 | 117.2 | 116.8 | 116.2 | 116.6 | 116.3 | 116.2 | 0.7      |

Table S1. Relative potential ( $V$ ) between the reference and sample DSMO solution containing 0.3vol% 19 M LiCl aqueous solution at  $T$  °C. The solutions contain 0.5 (1 –  $n_{\text{Fe}^{3+}}$ ) mM FeCl<sub>2</sub> and 0.5  $n_{\text{Fe}^{3+}}$  mM FeCl<sub>3</sub>, where  $n_{\text{Fe}^{3+}} [= [\text{Fe}^{3+}]/([\text{Fe}^{2+}]+[\text{Fe}^{3+}])]$  is the molar ratio of Fe<sup>3+</sup>. The  $V$  values were measured every five minutes. m and  $\sigma$  represent the mean value and standard deviation, respectively.

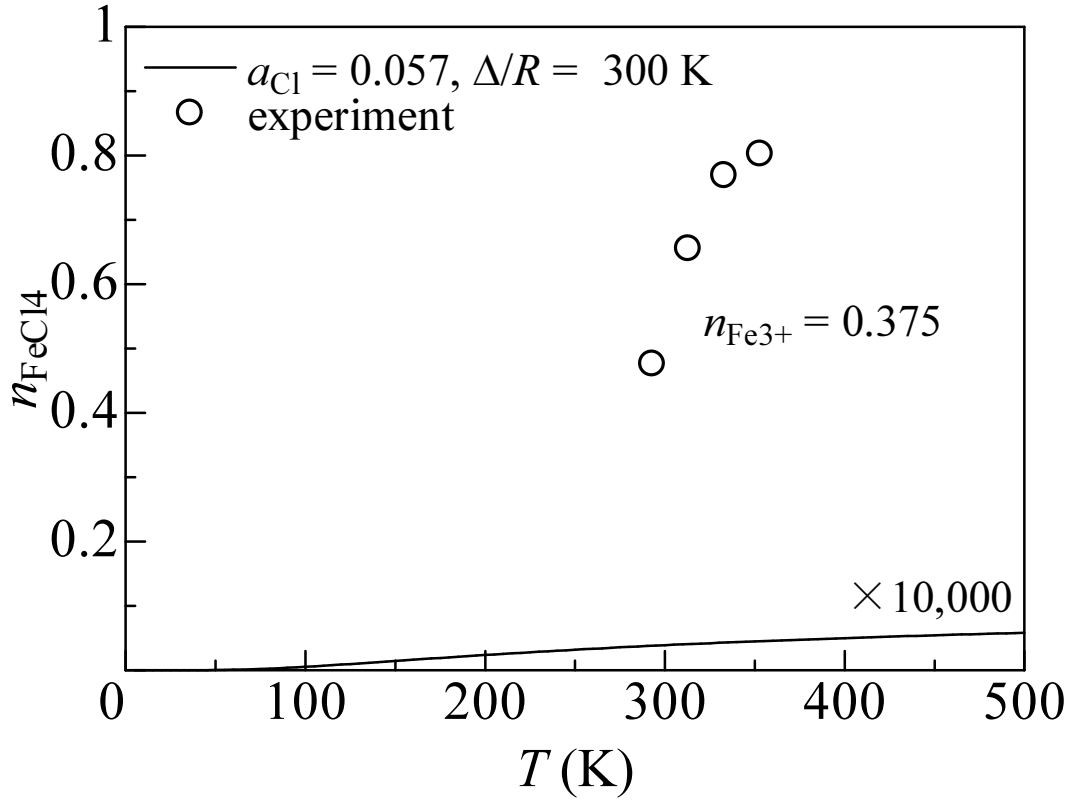

Fig. S1: Calculation of  $n_{\text{FeCl}_4}$  against temperature ( $T$ ) based on the equilibrium equation,  $[\text{FeL}_6]^{3+} + 4\text{Cl}^- \leftrightarrow [\text{FeCl}_4]^- + 6\text{L}$ . Open circles are the experimental data at  $n_{\text{Fe}^{3+}} = 0.375$ .  $n_{\text{Fe}^{3+}}$  is the molar ratio of  $\text{Fe}^{3+}$  among Fe ions.

We calculated  $n_{\text{FeCl}_4}$  against  $T$  based on the equilibrium equation,  $[\text{FeL}_6]^{3+} + 4\text{Cl}^- \leftrightarrow [\text{FeCl}_4]^- + 6\text{L}$ . The equilibrium constant  $K$  is represented as  $K = \exp(-\Delta G/RT) = a_{\text{FeCl}_4} a_{\text{L}}^6 / a_{\text{FeL}_6} a_{\text{Cl}}^4$ , where  $\Delta G$ ,  $R$ , and  $a_i$  is, the standard reaction Gibbs energy, the gas constant, and activity of  $i$ , respectively.  $a_{\text{FeCl}_4}$ ,  $a_{\text{L}}$ , and  $a_{\text{FeL}_6}$  are  $0.0005n_{\text{Fe}^{3+}} + n_{\text{FeCl}_4}$ , 1, and  $0.0005n_{\text{Fe}^{3+}}(1 - n_{\text{FeCl}_4})$ , respectively. After simple calculation, we obtain  $n_{\text{FeCl}_4} = a_{\text{Cl}}^4 \exp(-\Delta G/RT) / [1 + a_{\text{Cl}}^4 \exp(-\Delta G/RT)]$ . We set  $a_{\text{Cl}}$  to 0.057 since the average  $\text{Cl}^-$  concentration ( $[\text{Cl}^-]$ ) in solution is 57 mM. As exemplified by broken curve, the calculation fails to reproduce the experimental data. This is because  $a_{\text{Cl}}^4 \exp(-\Delta G/RT) \ll 1$  at any  $\Delta G (> 0)$ .
